# Supplementary material
Source: publisher figshare collection journal article supplement (https://rs.figshare.com/ndownloader/files/18613682)
Supplement: Supplementary file 1 [file 18613682]

**Dogs perceive and spontaneously normalise formant-related speaker and vowel differences in human speech sounds**

**Authors:** Holly Root-Gutteridge, Victoria F. Ratcliffe, Anna T. Korzeniowska, David Reby

**ESM Table 3 LME results for speaker discrimination. Factors significant at Bonferroni corrected p < 0.007 are marked in bold.**

| **Source** | **Numerator df** | **Denominator df** | **F** | **Sig.** |
| --- | --- | --- | --- | --- |
| Intercept | 1 | 13 | 14.552 | **0.002** |
| Age | 1 | 13 | 0.025 | 0.876 |
| Group | 5 | 13 | 0.998 | 0.457 |
| Location | 2 | 13 | 0.931 | 0.419 |
| Mix | 1 | 13 | 0.019 | 0.893 |
| Sex | 1 | 13 | 0.639 | 0.438 |
| Trial | 5 | 115 | 4.271 | **0.001** |
